# Supplementary material for: Reorientation behavior in the helical motility of light-responsive spiral droplets
Source: PubMed Central journal article supplement (PMC6868138; doi:10.1038/s41467-019-13201-6), 2019-11-20
Supplement: 41467_2019_13201_MOESM1_ESM.pdf [file 41467_2019_13201_MOESM1_ESM.pdf]

# Reorientation behaviour in the helical motility of light-responsive spiral droplets

**Federico Lancia,<sup>1</sup> Takaki Yamamoto,<sup>2</sup> Alexander Ryabchun,<sup>1</sup> Tadatsugu Yamaguchi,<sup>1</sup>  
Masaki Sano,<sup>3,4\*</sup> and Nathalie Katsonis<sup>1\*</sup>**

<sup>1</sup> Bio-inspired and Smart Materials, MESA+ Institute for Nanotechnology, University of Twente, PO Box 207, Enschede 7500AE, The Netherlands.

<sup>2</sup> Laboratory of Physical Biology, RIKEN Center for Biosystems Dynamics Research, Kobe 650-0047, Japan.

<sup>3</sup> Universal Biology Institute, The University of Tokyo, 7-3-1 Hongo, Bunkyo-ku, Tokyo 113-0033, Japan.

<sup>4</sup> Institute for Natural Sciences, Shanghai Jiao Tong University, No. 800 Dongchuan Rd, Minhang District, Shanghai 200240, China

\* Correspondence to: sano@phys.s.u-tokyo.ac.jp ; n.h.katsonis@utwente.nl

*Supplementary Information*

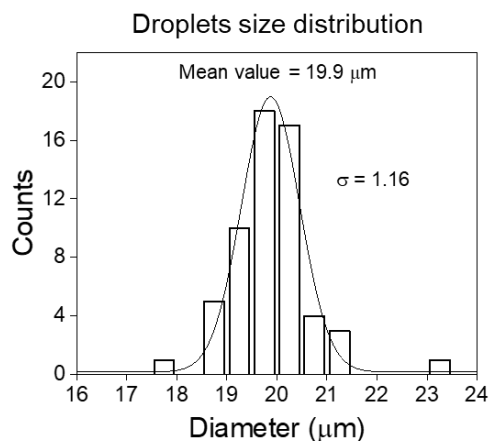

**Supplementary Figure 1. Polydispersity of the cholesteric droplets produced by injection in water.**

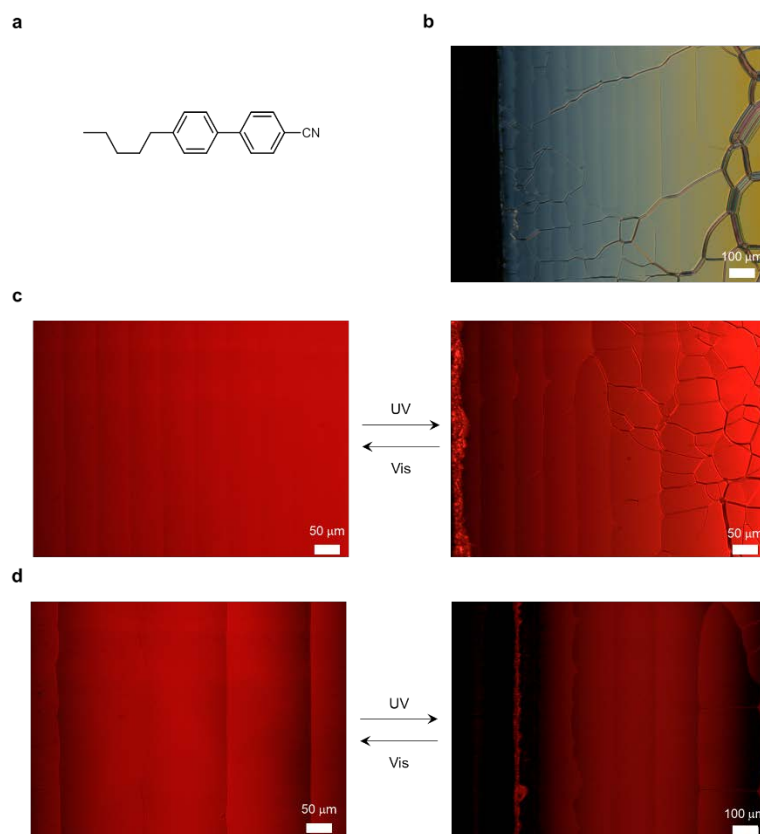

**Supplementary Figure 2. Characterization of the cholesteric liquid crystals used for the production of the droplets.** **a**, Nematic liquid crystal 5CB used as achiral host in all the compositions of cholesteric liquid crystals. **b**, **c**, **d**, Polarized optical microscopy images of wedge cells containing cholesteric liquid crystals doped with CB15(10 wt %), Ph-**m** (0.68 wt %) and Me-**m** (0.38 wt %), respectively. The Grandjean-Cano lines are visible and were used to measure the pitch of the cholesteric liquid crystal. For **c** and **d** the image on the right corresponds to the liquid crystal at the photo-stationary state (inverted handedness), for which the pitch is also measured.

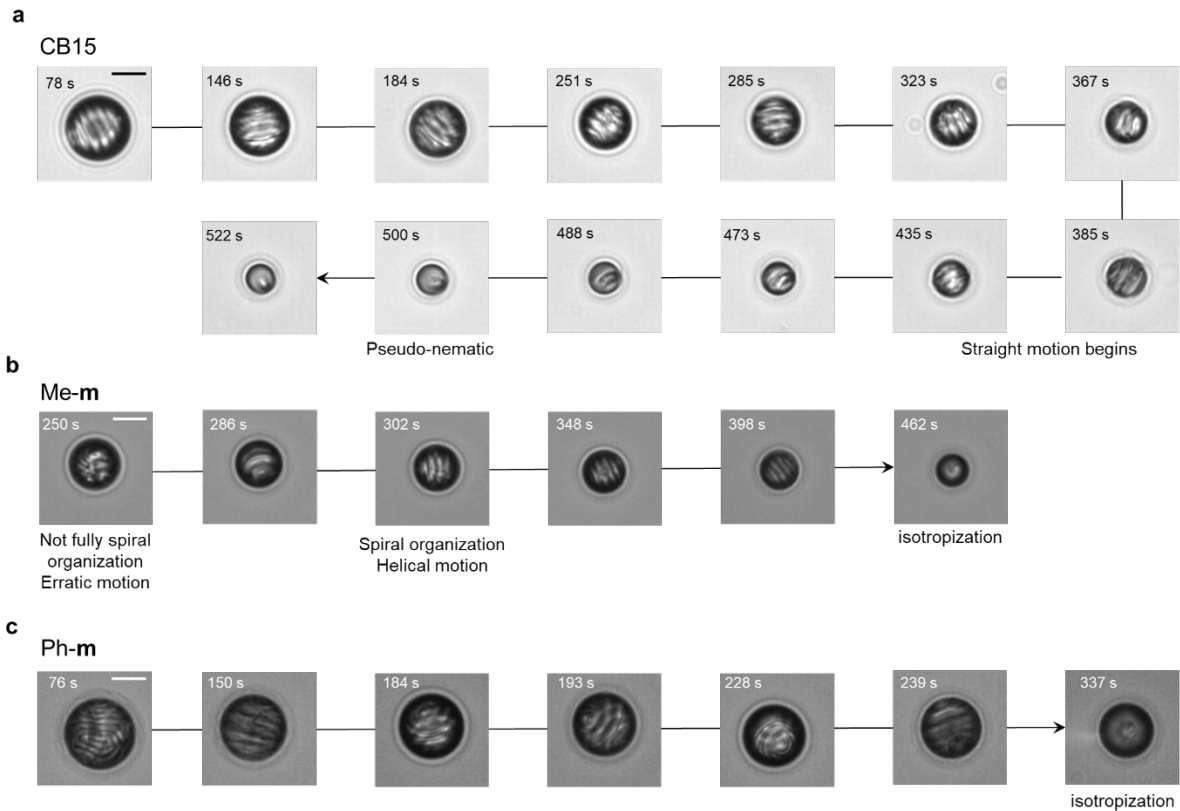

**Supplementary Figure 3. Evolution of the droplet in time, for different chiral dopants.** **a**, Droplets doped with CB15 initially display a well-defined spiral distribution of the director field. In time, the number of spiral disclination lines decreases and eventually (after  $\sim 500$  s), the chirality of the droplet is not expressed at the structural level anymore, i.e. the droplet can be considered pseudo-nematic. **b**, Droplets doped with Me-**m** need time to organize into the spiral configuration, after what they start swimming along helical trajectories (here after  $\sim 300$  s) and eventually the droplets become isotropic. **c**, Droplets doped with Ph-**m** swim helically after being created and they maintain a clear helical trajectory until isotropization occurs at 337s. The occurrence of isotropization for Ph-**m** and Me-**m** doped cholesteric droplets suggests that the dopant is concentrating in the droplet over time, in contrast to what happens when CB15 is used as a dopant. Scales bar are  $10 \mu\text{m}$ .

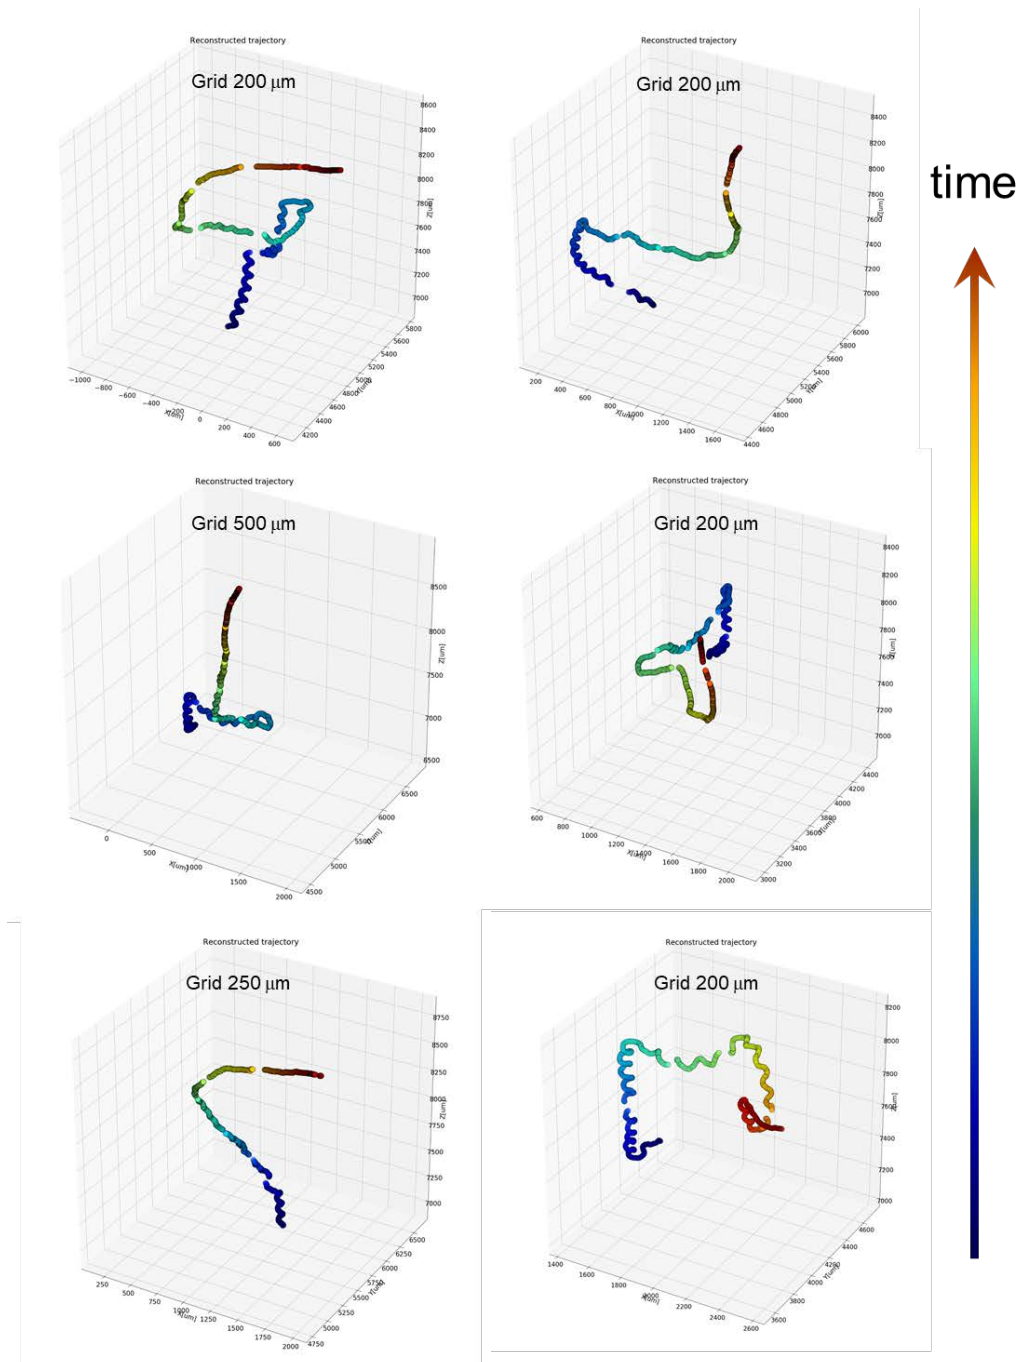

**Supplementary Figure 4. Three dimensional trajectories for droplets doped with CB15.** Notably the motion is helical right after injection of the droplet in the aqueous medium. The chirality confinement ratio  $N$  decreases over time until eventually the droplets loses its chiral configuration and propel straight. The top and bottom of the chambers are always at  $z$  values 8100 and 7000  $\mu\text{m}$ , respectively.

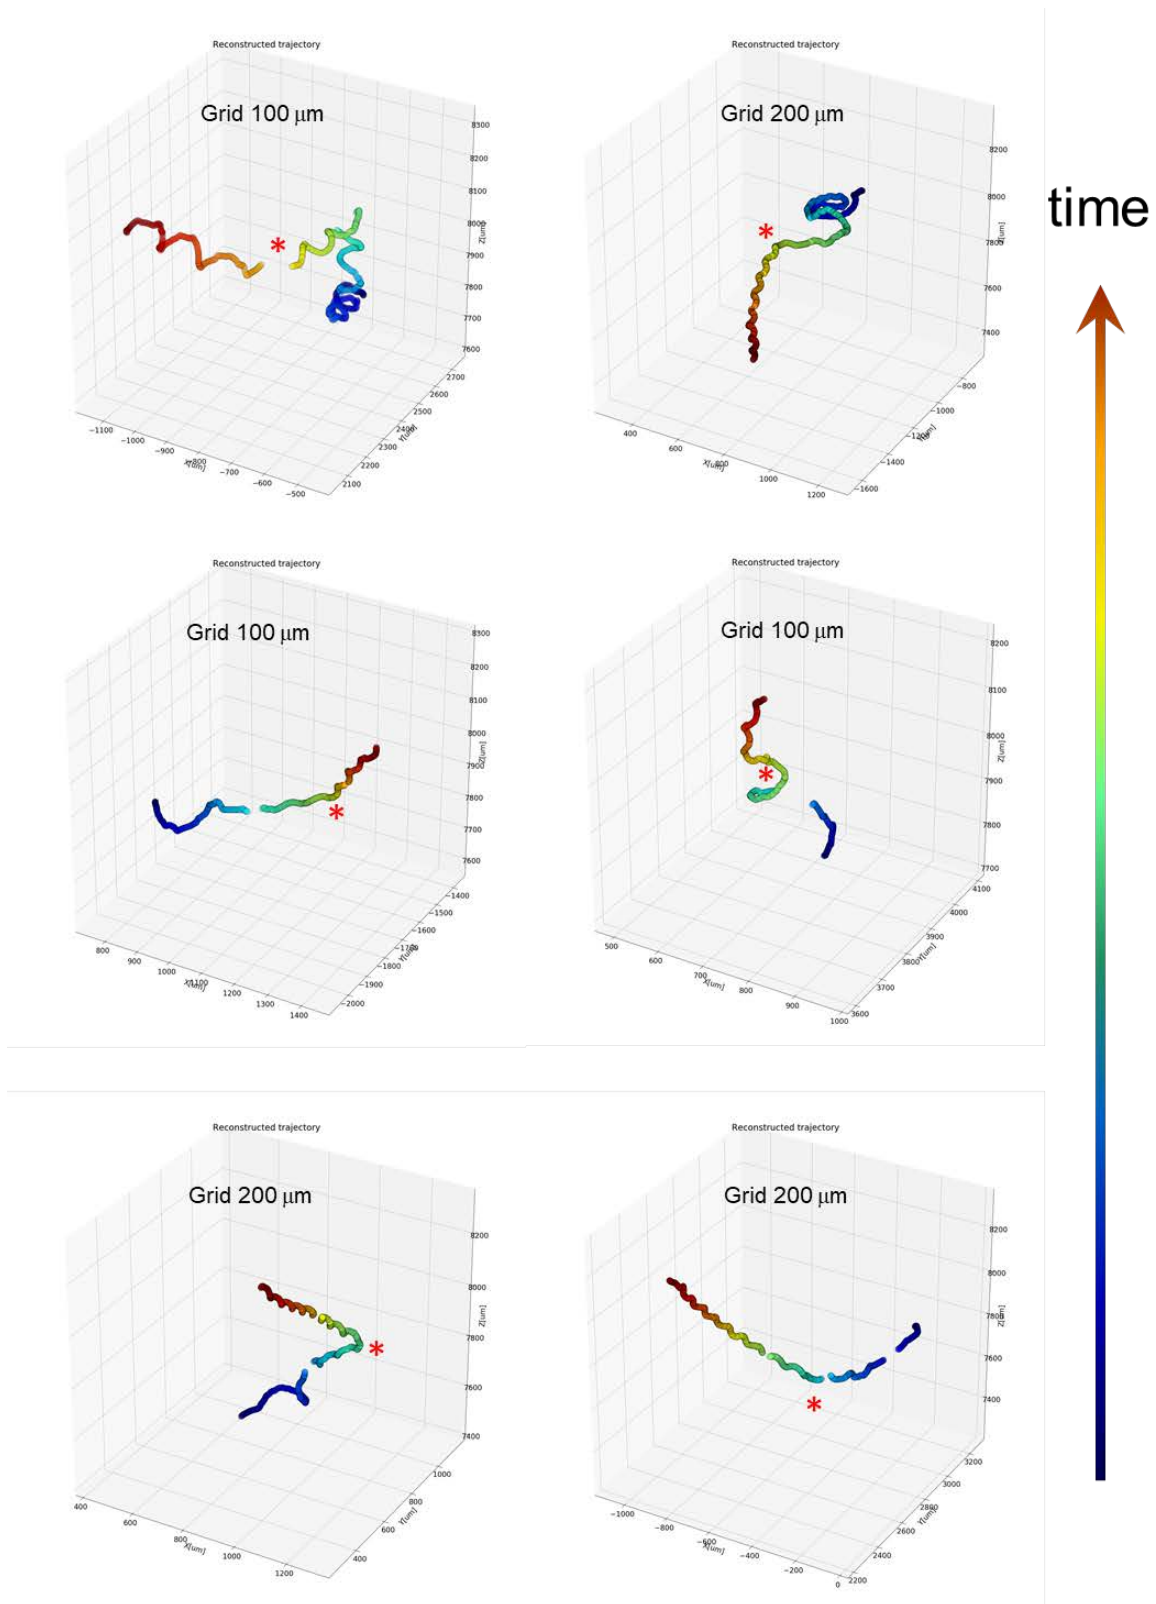

**Supplementary Figure 5. Three dimensional trajectories with abrupt helix inversion and directional change . The droplets are doped with Me-m. The red asterisks mark the switching event. The top and bottom of the chambers are always at  $z$  values 8100 and 7000 μm, respectively.**

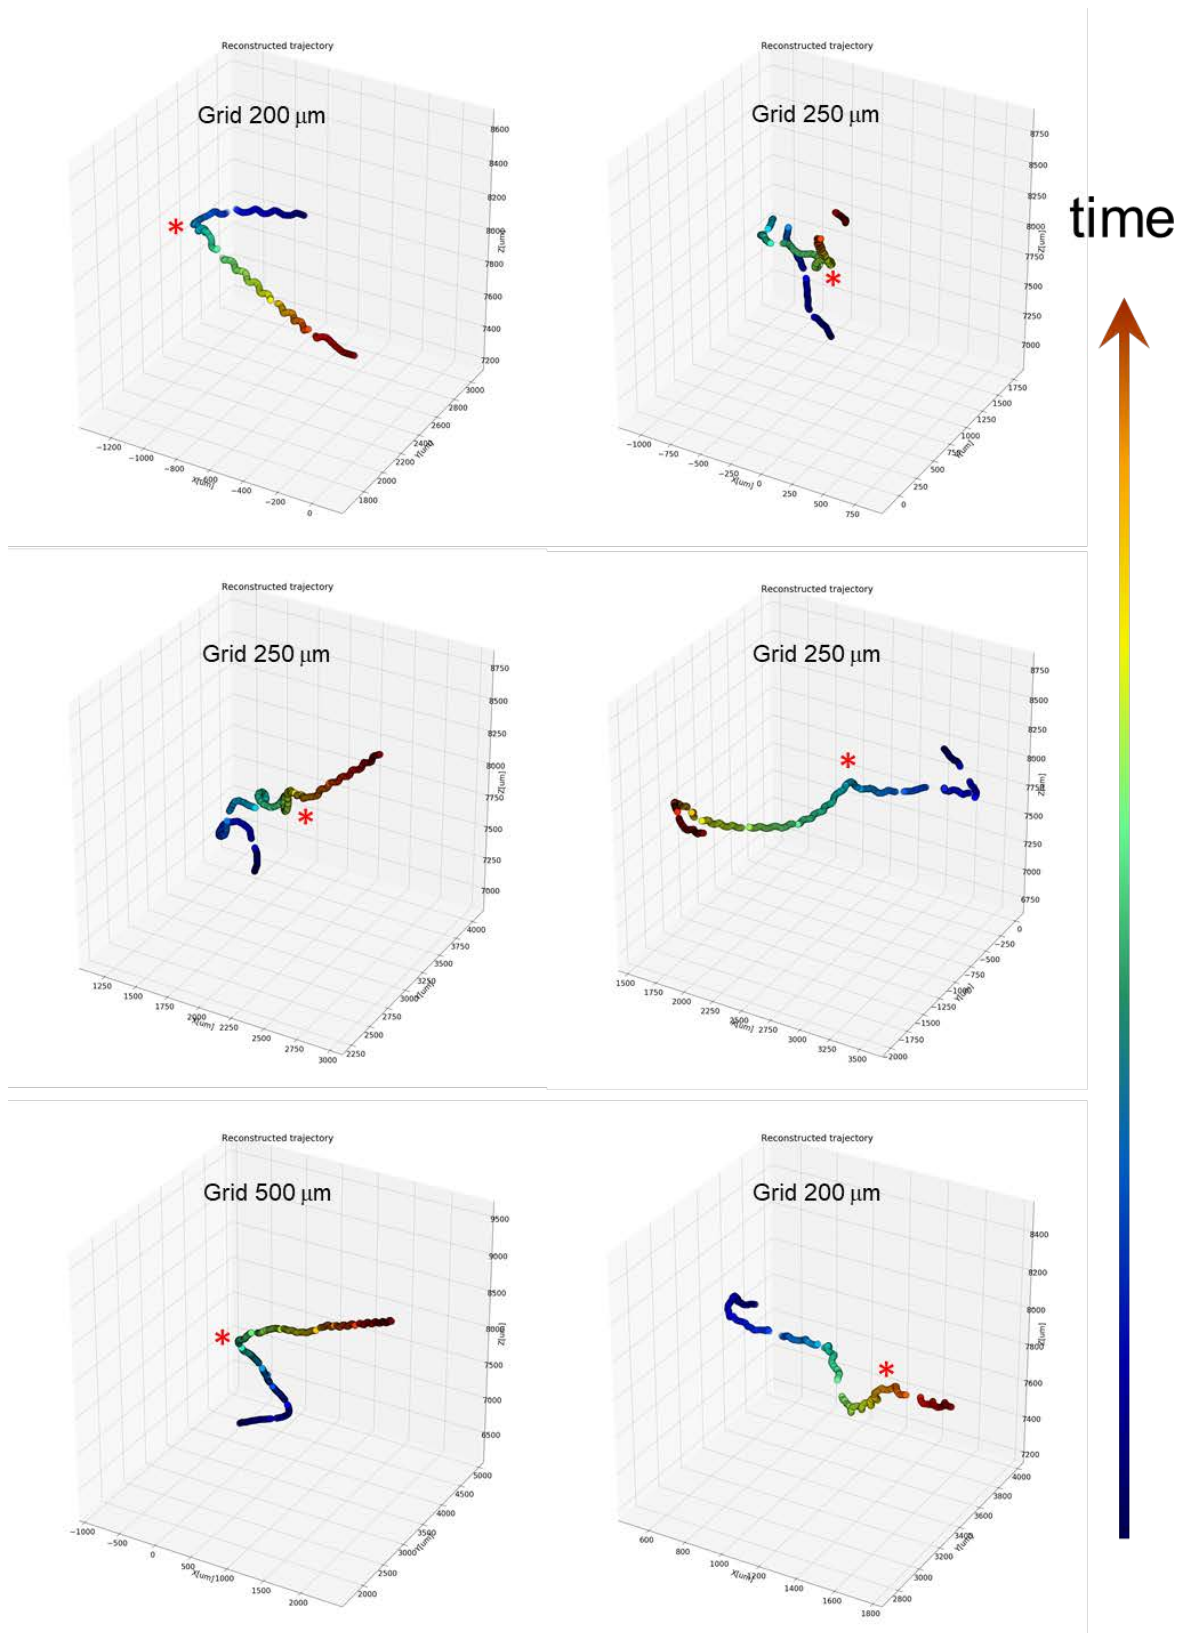

**Supplementary Figure 6. Three dimensional trajectories with abrupt helix inversion and directional change . The droplets are doped with Me-m. The red asterisks mark the switching event. The top and bottom of the chambers are always at z values 8100 and 7000  $\mu\text{m}$ , respectively.**

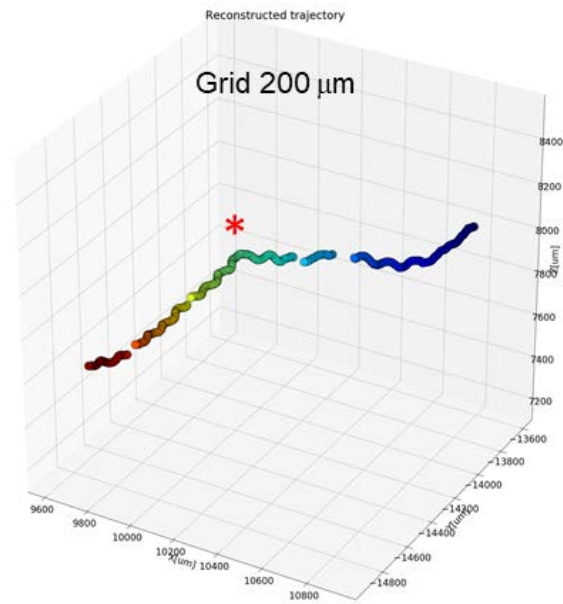

**Supplementary Figure 7. Three dimensional trajectory with abrupt helix inversion and directional change . The droplet is doped with Me-m. The red asterisks mark the switching event. The top and bottom of the chambers are always at z values 8100 and 7000 μm, respectively.**

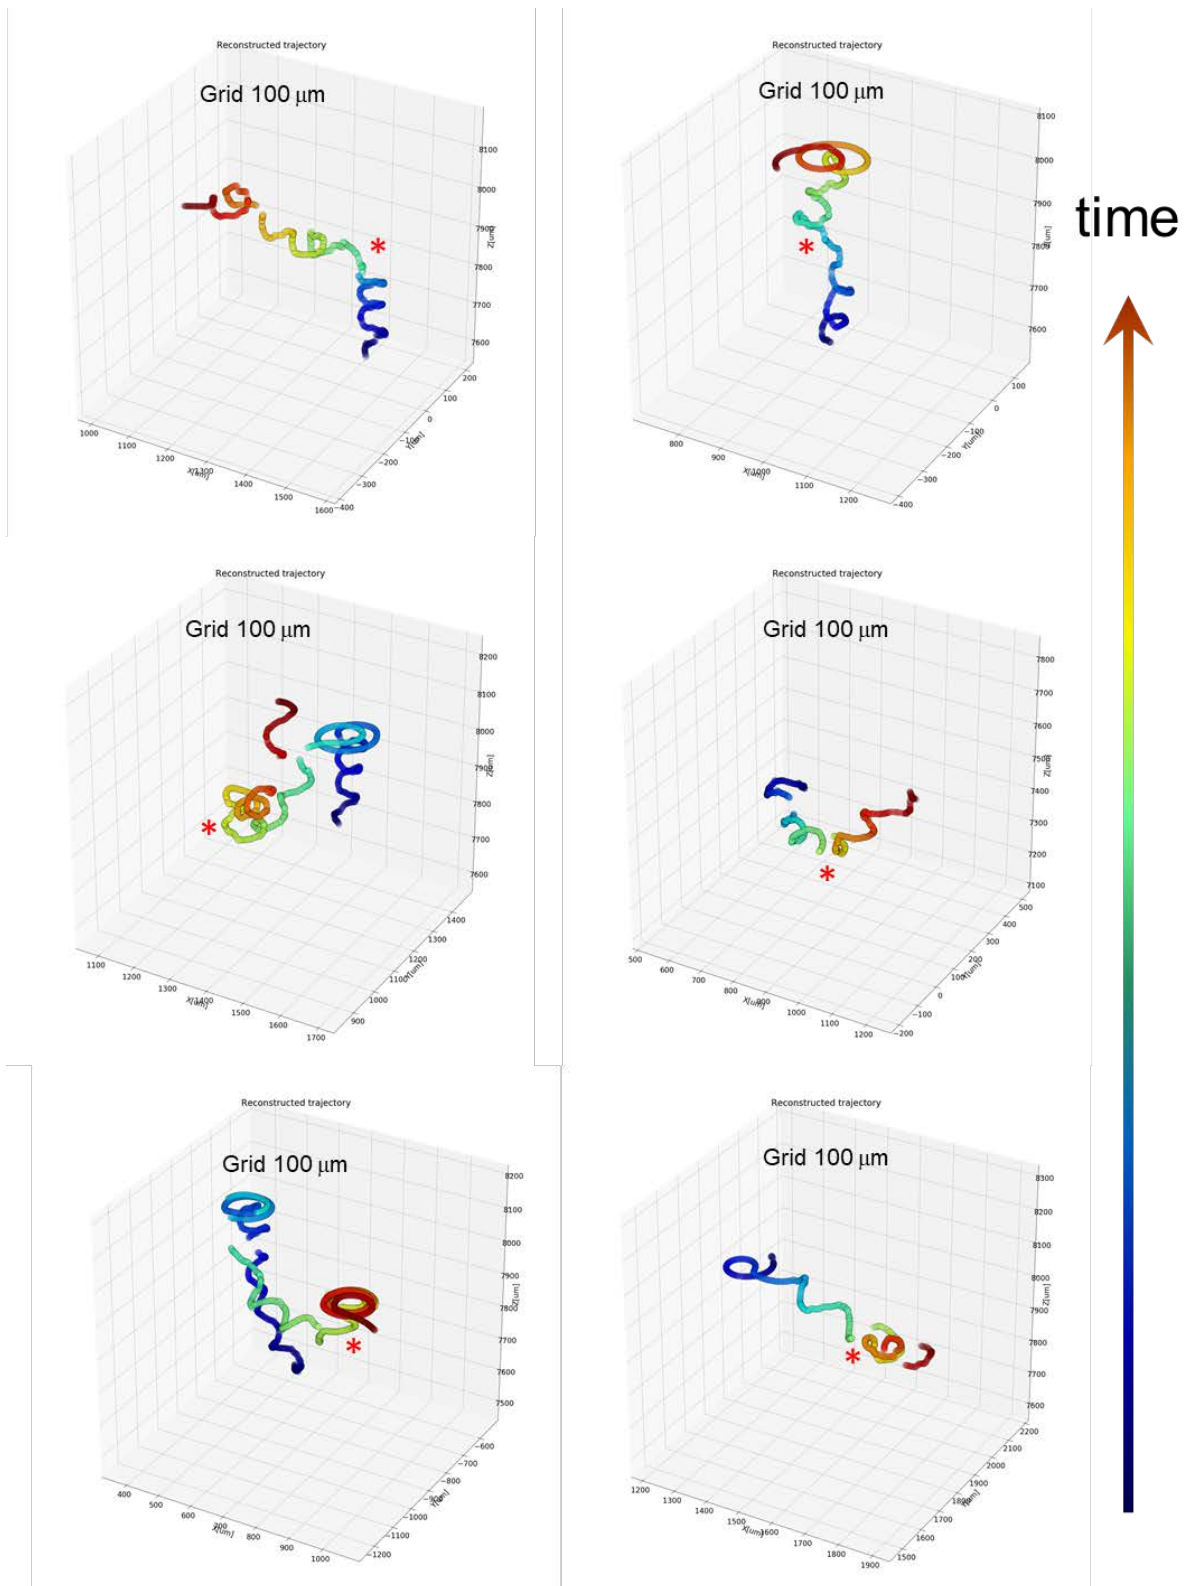

**Supplementary Figure 8. Three dimensional trajectories with abrupt helix inversion and directional change. The droplets are doped with Ph-m. The red asterisks mark the switching event. The grid is  $100\ \mu\text{m} \times 100\ \mu\text{m} \times 100\ \mu\text{m}$ . The top and bottom of the chambers are always at z values 8100 and 7000  $\mu\text{m}$ , respectively.**



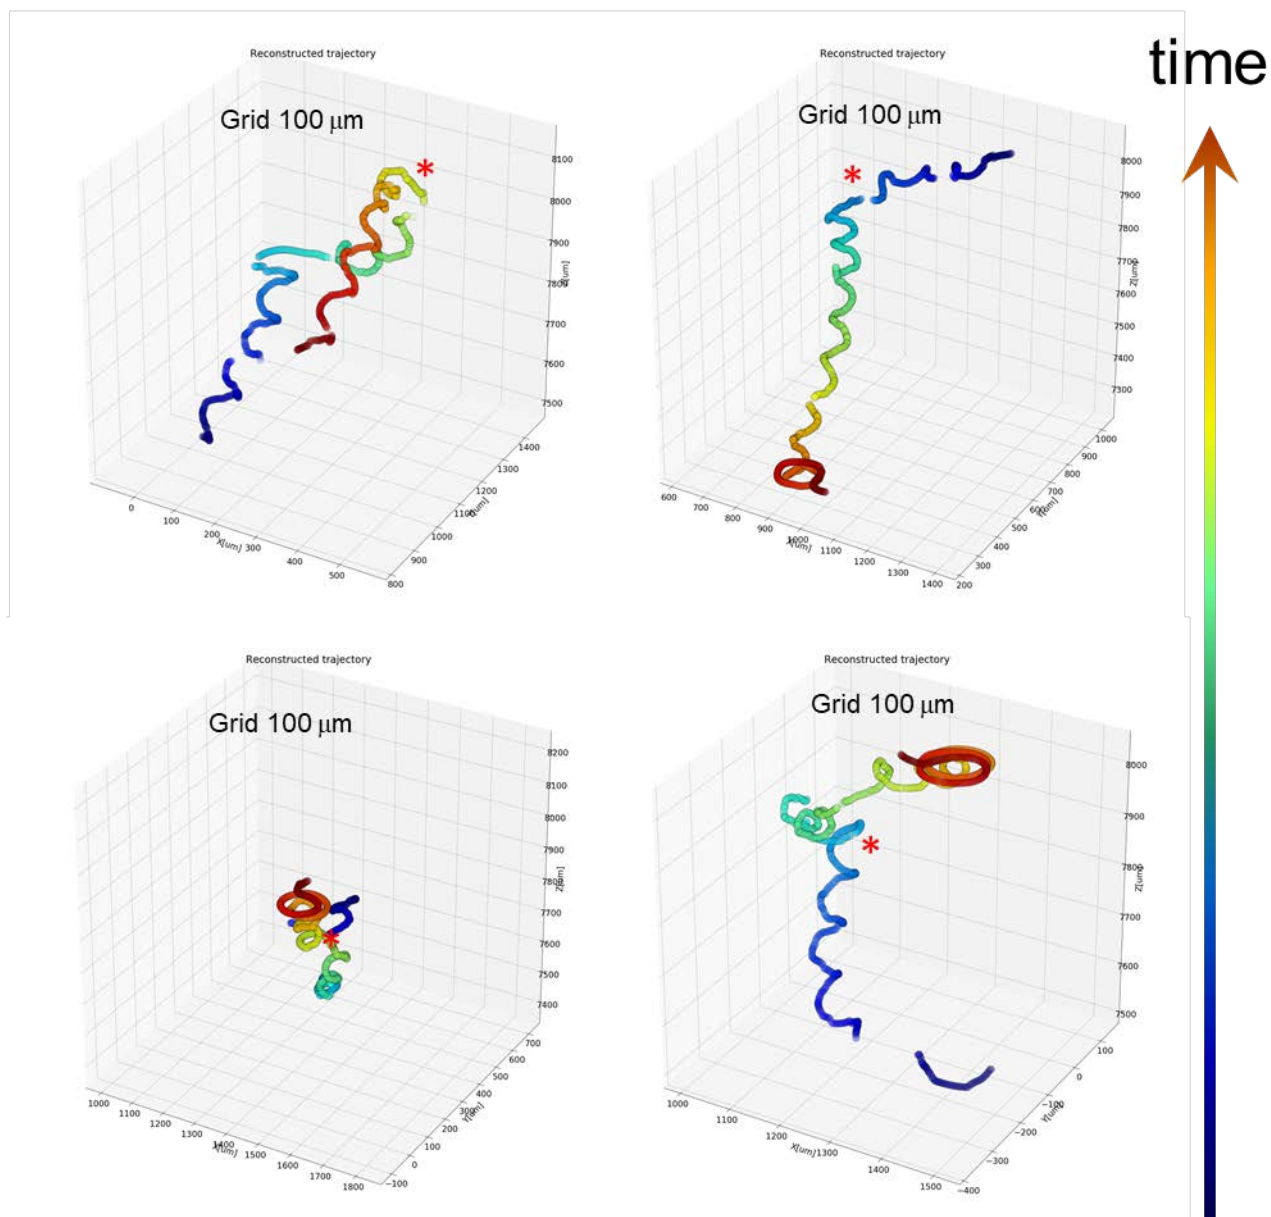

**Supplementary Figure 9. Three dimensional trajectories with abrupt helix inversion and directional change . The droplets are doped with Ph-m. The red asterisks mark the switching event. The grid is  $100\ \mu\text{m} \times 100\ \mu\text{m} \times 100\ \mu\text{m}$ . The top and bottom of the chambers are always at z values 8100 and 7000  $\mu\text{m}$ , respectively..**

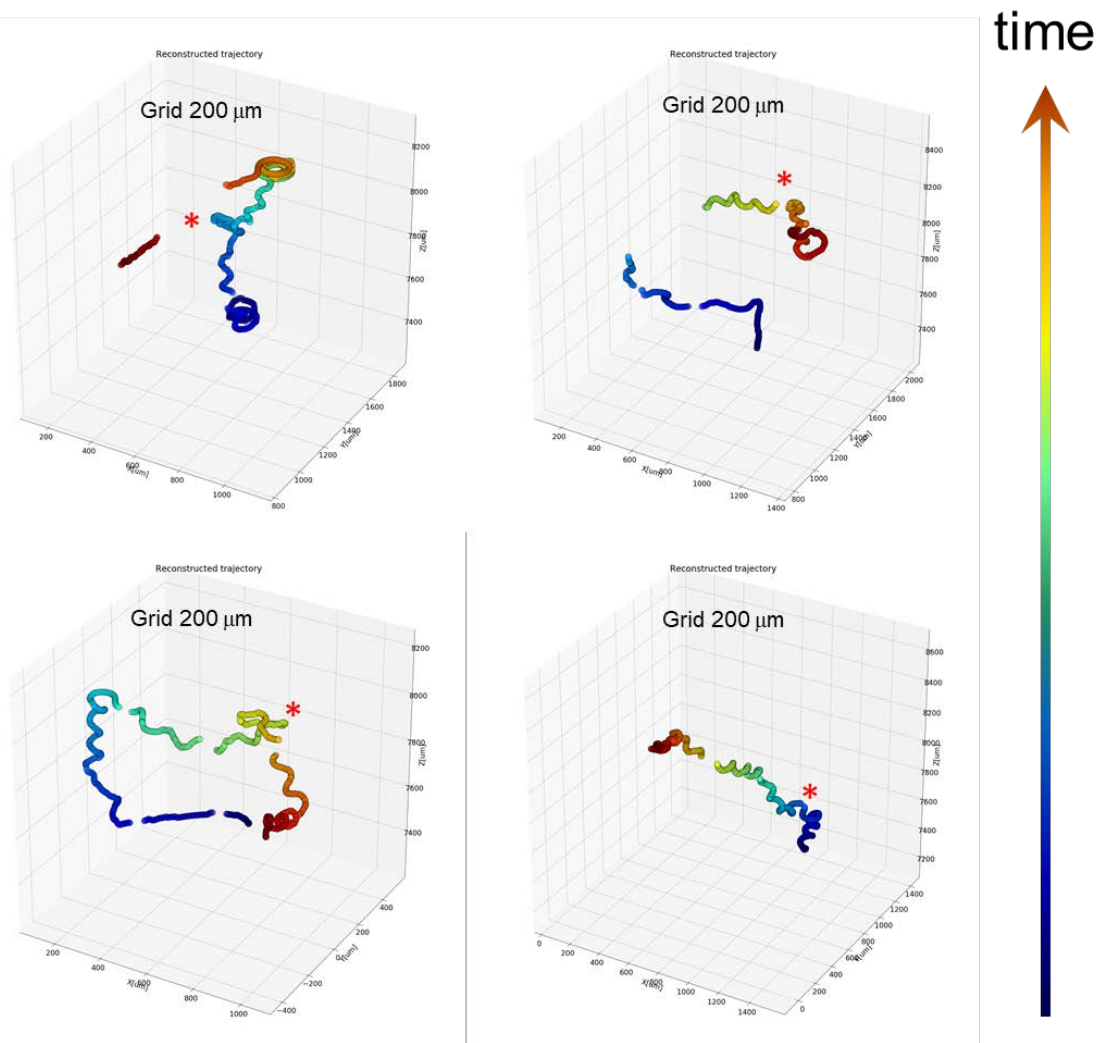

**Supplementary Figure 10. Three dimensional trajectories with abrupt helix inversion and directional change . The droplets are doped with Ph-m. The red asterisks mark the switching event. The grid is 200 μm × 200 μm × 200 μm. The top and bottom of the chambers are always at z values 8100 and 7000 μm, respectively..**

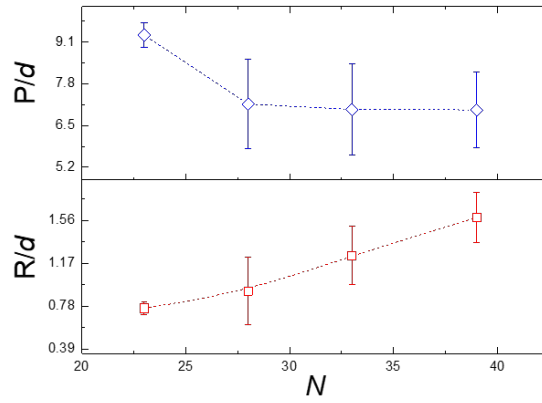

**Supplementary Figure 11. Evolution of the pitch and radius of the helical trajectory with increasing values of chirality confinement  $N$ .** The relative radius ( $R/d$ , where  $d$  is the diameter of the droplet) increase with the increase in chirality confinement ratio  $N$ . The relative pitch ( $P/d$ , where  $d$  is diameter of the droplet) decreases with an increase of  $N$ . The error bars represent the standard deviation.
